# Supplementary material for: OmpR and Prc contribute to switch the Salmonella morphogenetic program in response to phagosome cues
Source: PubMed Central journal article supplement — Mol Microbiol. 2022 Oct 2;118(5):477–93. doi: 10.1111/mmi.14982 (PMC9827838; doi:10.1111/mmi.14982), 2022-10-02
Supplement: MMI-118-477-s001.pdf [file MMI-118-477-s001.pdf]

## Supplementary material: Figures S1 to S7 and Tables S1 / S2.

### OmpR and Prc contribute to switch the *Salmonella* morphogenetic program in response to phagosome cues

David López-Escarpa, Sónia Castanheira and Francisco García-del Portillo

- FIG S1.** Unspecific band detected with the anti-FLAG antibody in both untagged and tagged *S. Typhimurium* strains.
- FIG S2.** The carboxypeptidase PBP6 (DacC), which cleaves stem peptides in the PG, is not regulated by OmpR in *S. Typhimurium*.
- FIG S3.** The alternative sigma factors RpoS and RpoE do not regulate the expression of PBP2<sub>SAL</sub> and PBP3<sub>SAL</sub> *S. Typhimurium*
- FIG S4.** Effect of osmolyte concentration on the growth of *S. Typhimurium* in the nutrient-poor medium PCN at an acid pH of 4.6.
- FIG S5.** Micromolar amounts of magnesium and acid pH cause in *S. Typhimurium* a significant drop in PBP2/PBP3 levels.
- FIG S6.** The levels of MurF, enzyme required for synthesis of the PG precursor lipid II do not drop drastically in response to phagosome cues.
- FIG S7.** The morphology and PBP3 levels are not affected in the nutrient poor PCN medium at neutral pH irrespective of the amount of NaCl added
- Table S1.** Bacterial strains and plasmids used in the study.
- Table S2.** Oligonucleotides used in the study as primers.

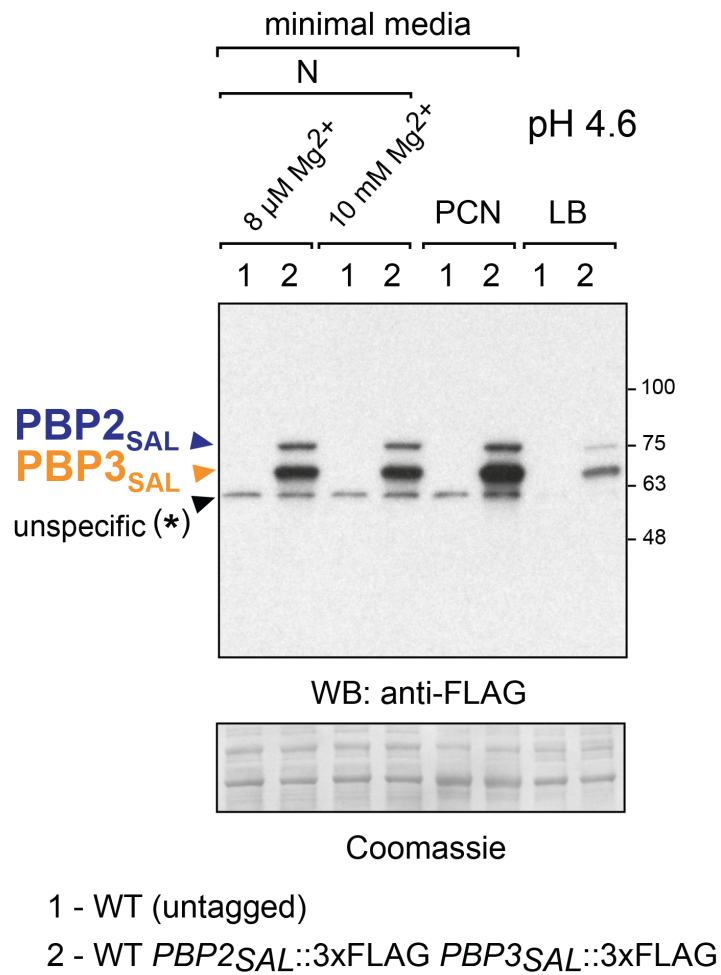

**FIG. S1. Unspecific band detected with the anti-FLAG antibody in both untagged and tagged *S. Typhimurium* strains.** PBP2<sub>SAL</sub> and PBP3<sub>SAL</sub> were resolved using precast 4-20% gradient gels (see Materials and Methods). Protein extracts were prepared at pH 4.6 from bacteria grown in the indicated minimal (N, PCN), and nutrient-rich (LB) media.

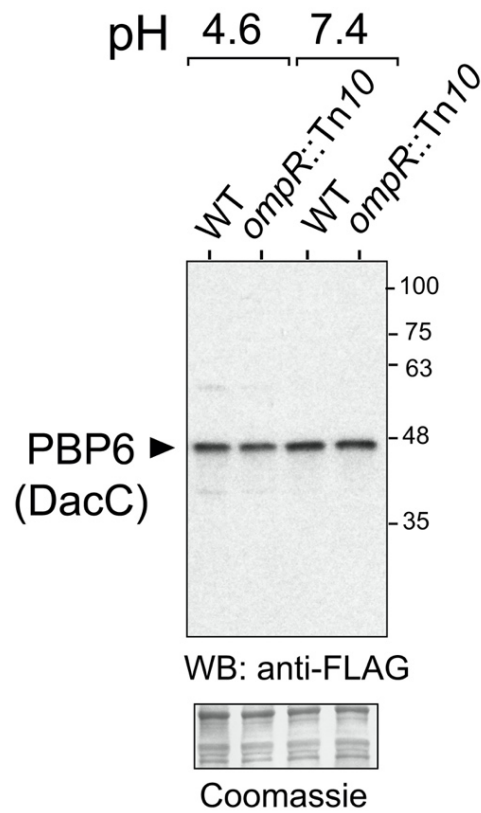

**FIG S2. The carboxypeptidase PBP6 (DacC), which cleaves stem peptides in the PG, is not regulated by OmpR in *S. Typhimurium*.** Shown are the levels of this enzyme detected in isogenic strains bearing a *dacC*::3xFLAG allele inserted in the native chromosomal locations and grown in nutrient poor N medium supplemented with 10 mM MgCl<sub>2</sub> at the indicated pH values. Coomassie staining is depicted as loading control. Data correspond to a representative experiment of a total of two independent biological replicates.

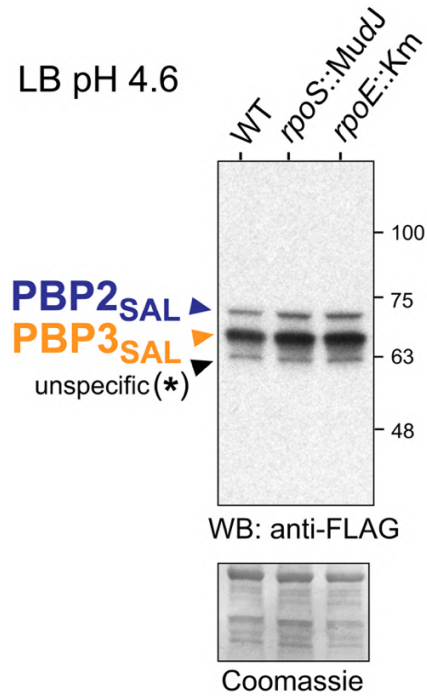

**FIG. S3. The alternative sigma factors RpoS and RpoE do not regulate the expression of PBP2<sub>SAL</sub> and PBP3<sub>SAL</sub> in *S. Typhimurium*.** Shown are the levels of these two enzymes in isogenic doubly tagged strains bearing *PBP2<sub>SAL</sub>::3xFLAG* and *PBP3<sub>SAL</sub>::3xFLAG* alleles inserted in their native chromosomal locations and grown in the nutrient rich LB medium at pH 4.6. Coomassie staining is depicted as loading control. Data correspond to a representative experiment of a total of two independent biological replicates.

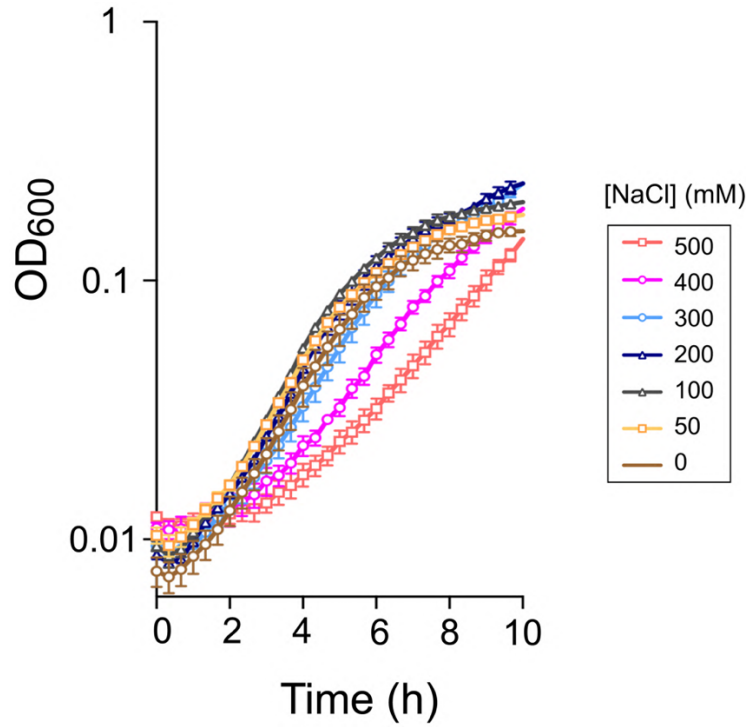

**FIG S4. Effect of osmolyte concentration on the growth of *S. Typhimurium* in the nutrient-poor medium PCN at an acid pH of 4.6.** Shown are the growth curves obtained with bacteria cultures supplemented with the indicated concentrations of NaCl. Data correspond to the mean and SD of a representative experiment with three technical replicates from a total of two independent biological replicates.

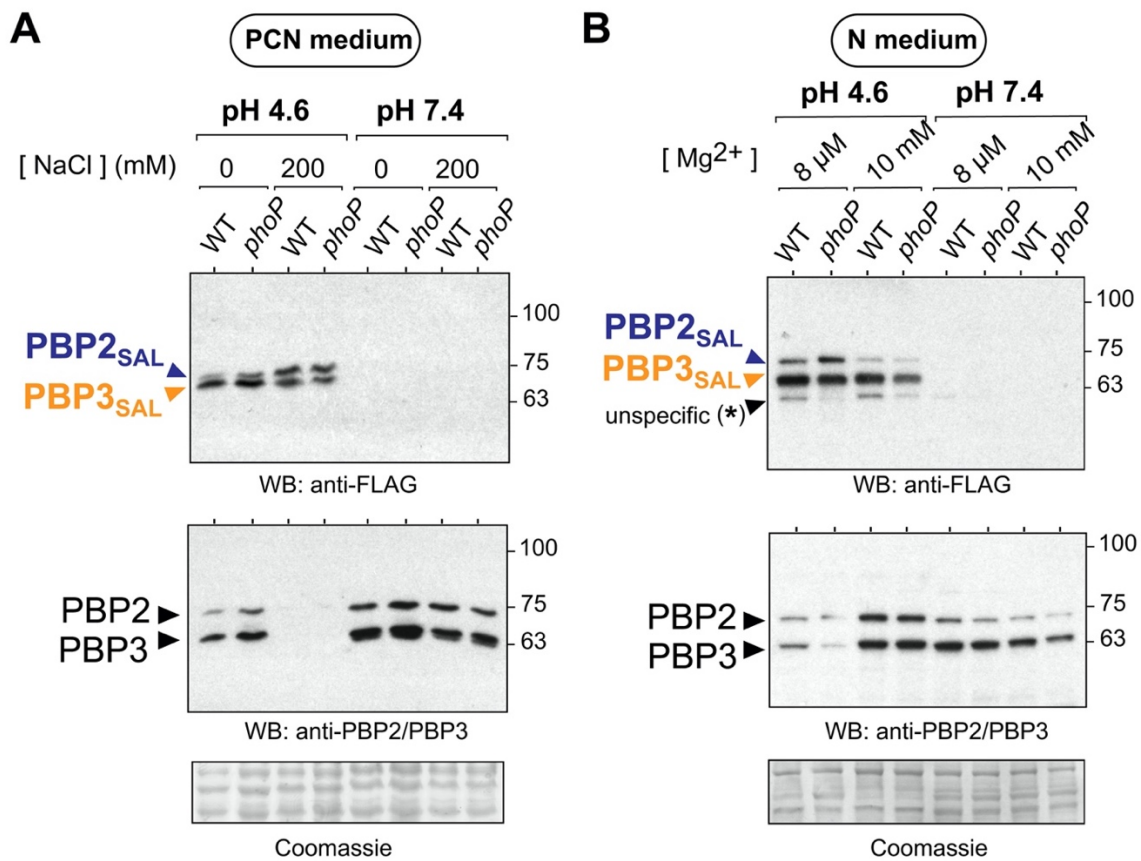

**FIG. S5. Micromolar amounts of magnesium and acid pH cause in *S. Typhimurium* a significant drop in PBP2/PBP3 levels.** (A) Levels of PBP2/PBP3 and PBP2<sub>SAL</sub>/PBP3<sub>SAL</sub> in wild type and *phoP* isogenic strains grown in minimal PCN medium at the indicated pH and osmolarities. (B) same as in (A) but in bacteria grown in N minimal media at two different pH (4.6 and 7.4) and magnesium concentrations (8 μM and 10 mM). Low magnesium concentration (8 μM) and acid pH of 4.6 triggers the loss of PBP2 and PBP3 while the production of PBP2<sub>SAL</sub> and PBP3<sub>SAL</sub> increases notoriously. Coomassie staining is included as the loading control. Data shown are representative of a minimum of three independent biological replicates.

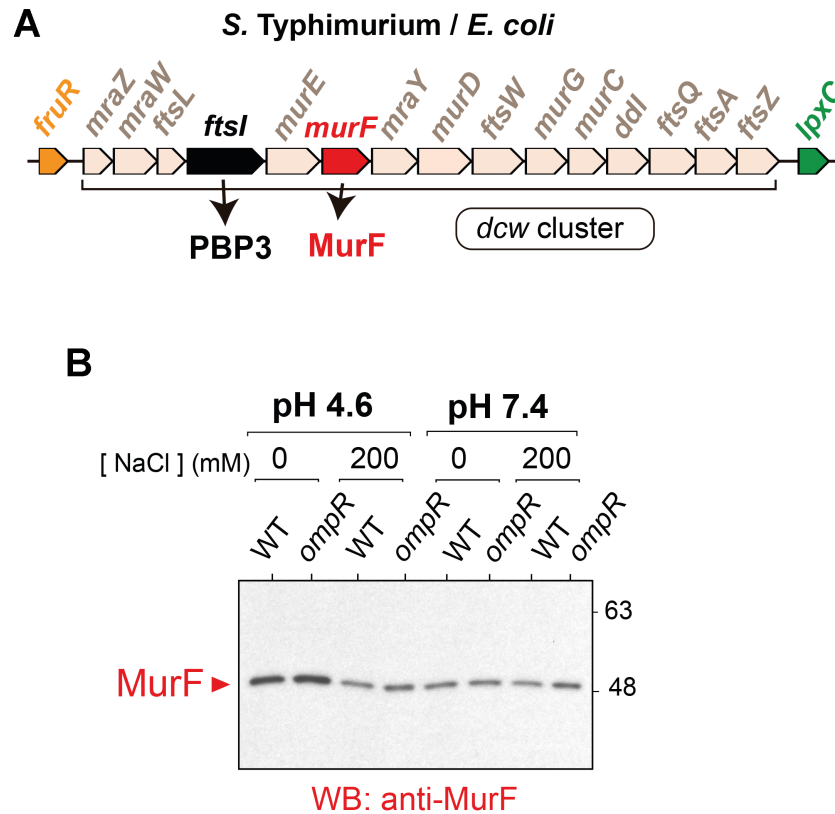

**FIG S6. The levels of MurF, enzyme required for synthesis of the PG precursor lipid II do not drop drastically in response to phagosome cues.** (A) Diagram of the division and cell wall (*dcw*) multicistronic gene cluster conserved in *E. coli* and *S. Typhimurium*. The positions of *ftsI*, encoding PBP3, and *murF*, encoding an essential cytosolic enzyme involved in the synthesis of the PG precursor lipid II, are depicted. (B) Levels of MurF in *S. Typhimurium* grown to mid-exponential phase in the nutrient poor PCN medium at the indicated conditions of pH and osmolarity. Shown is a representative experiment of a total of three biological replicates.

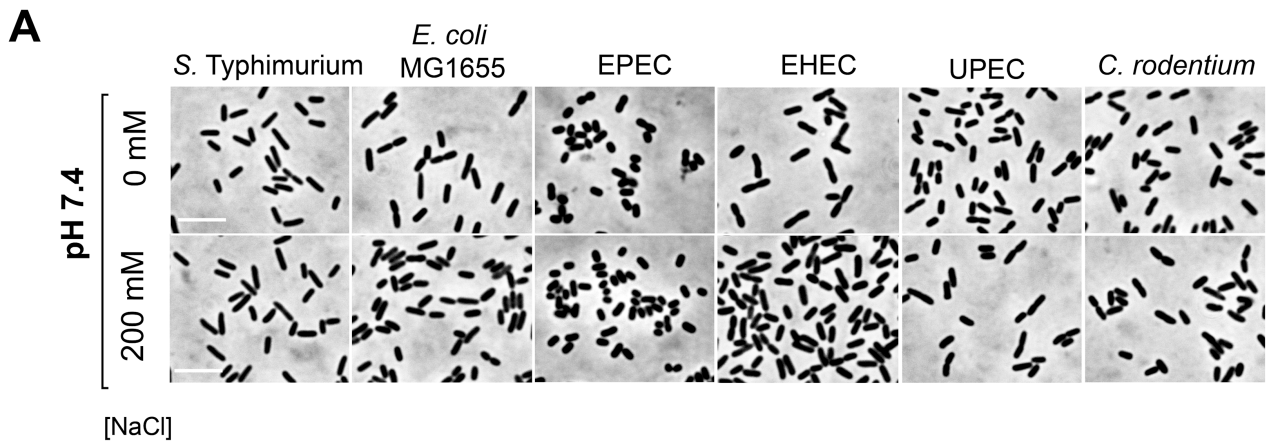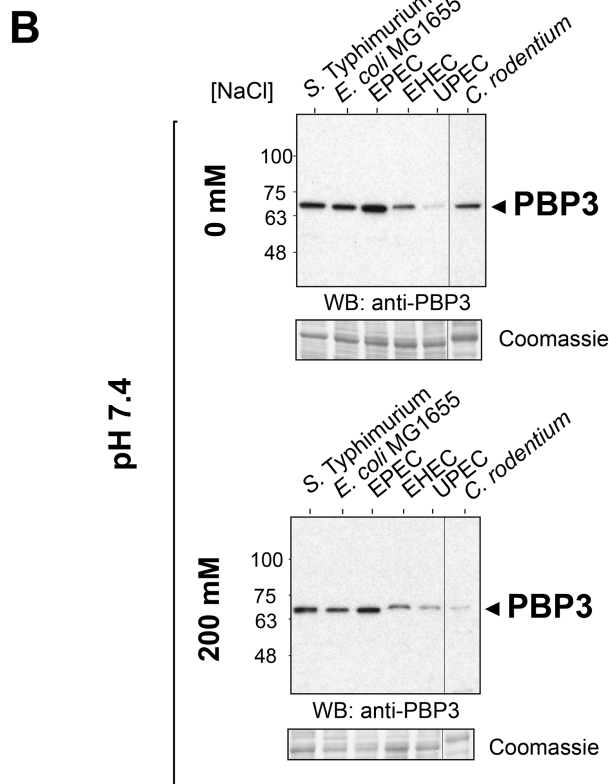

**FIG S7. The morphology and PBP3 levels are not affected in the nutrient poor PCN medium at neutral pH irrespective of the amount of NaCl added.** (A) Images of *S. Typhimurium* and the indicated *E. coli* isolates grown to mid-exponential phase in PCN medium at pH 7.4 at low or high osmolarity (0 mM, 200 mM NaCl). Bar, 5 μm. (B) PBP3 levels detected by immunoassay in the same samples observed at the microscope. The Coomassie staining is shown as loading control. Data are from a representative experiment of a total of two independent biological replicates.



**Table S1.** Bacterial strains and plasmids used in the study

| Bacterial strain/<br>plasmid | Relevant genotype                                                                                          | Source/<br>reference               |
|------------------------------|------------------------------------------------------------------------------------------------------------|------------------------------------|
| <i>S. Typhimurium</i>        |                                                                                                            |                                    |
| SV5015                       | SL1344 <i>hisG</i> <sup>+</sup>                                                                            | (Vivero <i>et al.</i> , 2008)      |
| MD5064                       | SV5015 PBP2 <sub>SAL</sub> -3xFLAG PBP3 <sub>SAL</sub> -3xFLAG                                             | (Castanheira <i>et al.</i> , 2020) |
| MD5080                       | SV5015 <i>ompR1009::Tn10</i> PBP2 <sub>SAL</sub> -3xFLAG PBP3 <sub>SAL</sub> -3xFLAG                       | This study                         |
| MD5540                       | SV5015 <i>phoP7953::Tn10</i> PBP2 <sub>SAL</sub> -3xFLAG PBP3 <sub>SAL</sub> -3xFLAG                       | This study                         |
| MD2540                       | SV5015 PBP2 <sub>SAL</sub> -3xFLAG::Km <sup>R</sup>                                                        | This study                         |
| MD3841                       | SV5015 <i>ompR1009::Tn10</i> PBP2 <sub>SAL</sub> -3xFLAG                                                   | This study                         |
| MD3896                       | SV5015 <i>phoP7953::Tn10</i> PBP2 <sub>SAL</sub> -3xFLAG                                                   | This study                         |
| MD3894                       | SV5015 <i>slyA::pRR10ΔtrfAPen<sup>R</sup></i> PBP2 <sub>SAL</sub> -3xFLAG::Km <sup>R</sup>                 | This study                         |
| MD5140                       | SV5015 <i>ssrB:: Km<sup>R</sup></i> PBP2 <sub>SAL</sub> -3xFLAG                                            | M. Hensel                          |
| MD2559                       | SV5015 PBP3 <sub>SAL</sub> -3xFLAG                                                                         | (Castanheira <i>et al.</i> , 2017) |
| MD3842                       | SV5015 <i>ompR1009::Tn10</i> PBP3 <sub>SAL</sub> -3xFLAG                                                   | (Castanheira <i>et al.</i> , 2017) |
| MD3897                       | SV5015 <i>phoP7953::Tn10</i> PBP3 <sub>SAL</sub> -3xFLAG                                                   | (Castanheira <i>et al.</i> , 2017) |
| MD3895                       | SV5015 <i>slyA::pRR10ΔtrfAPen<sup>R</sup></i> PBP3 <sub>SAL</sub> -3xFLAG::Km <sup>R</sup>                 | (Castanheira <i>et al.</i> , 2017) |
| MD5139                       | SV5015 <i>ssrB:: Km<sup>R</sup></i> PBP3 <sub>SAL</sub> -3xFLAG                                            | M. Hensel                          |
| MD5416                       | SV5015 <i>Δprc::Km<sup>R</sup></i> PBP2 <sub>SAL</sub> -3xFLAG PBP3 <sub>SAL</sub> -3xFLAG                 | This study                         |
| MD5420                       | SV5015 <i>ompR1009::Tn10 Δprc::Km<sup>R</sup></i> PBP2 <sub>SAL</sub> -3xFLAG PBP3 <sub>SAL</sub> -3xFLAG  | This study                         |
| MD5421                       | SV5015 <i>mrcA-3xFLAG::Km<sup>R</sup></i> PBP2 <sub>SAL</sub> -3xFLAG PBP3 <sub>SAL</sub> -                | This study                         |
| MD5422                       | SV5015 <i>mrcB-3xFLAG::Km<sup>R</sup></i> PBP2 <sub>SAL</sub> -3xFLAG PBP3 <sub>SAL</sub> -                | This study                         |
| MD5425                       | SV5015 pAC-6xHis- <i>ftsI</i> (6xHis-PBP3)                                                                 | This study                         |
| MD5426                       | SV5015 <i>Δprc::Km<sup>R</sup></i> pAC-6xHis- <i>ftsI</i> (6xHis-PBP3)                                     | This study                         |
| MD5427                       | SV5015 pAC-6xHis-PBP3 <sub>SAL</sub>                                                                       | This study                         |
| MD5428                       | SV5015 <i>Δprc::Km<sup>R</sup></i> pAC-6xHis-PBP3 <sub>SAL</sub>                                           | This study                         |
| MD5436                       | SV5015 pGEN222(Δ <i>PompC-ova</i> )-PPBP2 <sub>SAL</sub> - <i>gfp</i> <sup>TCD</sup>                       | This study                         |
| MD5437                       | SV5015 pGEN222(Δ <i>PompC-ova</i> )-PPBP3 <sub>SAL</sub> - <i>gfp</i> <sup>TCD</sup>                       | This study                         |
| MD5438                       | SV5015 <i>ompR1009::Tn10</i> pGEN222(Δ <i>PompC-ova</i> )-PPBP2 <sub>SAL</sub> - <i>gfp</i> <sup>TCD</sup> | This study                         |

|        |                                                                                                                     |                                        |
|--------|---------------------------------------------------------------------------------------------------------------------|----------------------------------------|
| MD5439 | SV5015 <i>ompR1009::Tn10</i> pGEN222( $\Delta$ PompC- <i>ova</i> )-PPBP3 <sub>SAL</sub> - <i>gfp</i> <sup>TCD</sup> | This study                             |
| MD5440 | SV5015 <i>phoP7953::Tn10</i> pGEN222( $\Delta$ PompC- <i>ova</i> )-PPBP2 <sub>SAL</sub> - <i>gfp</i> <sup>TCD</sup> | This study                             |
| MD5441 | SV5015 <i>phoP7953::Tn10</i> pGEN222( $\Delta$ PompC- <i>ova</i> )-PPBP3 <sub>SAL</sub> - <i>gfp</i> <sup>TCD</sup> | This study                             |
| MD5446 | SV5015 pGEN222( $\Delta$ PompC- <i>ova</i> )-mut-PPBP2 <sub>SAL</sub>                                               | This study                             |
| MD5447 | SV5015 pGEN222( $\Delta$ PompC- <i>ova</i> )-mut-PPBP3 <sub>SAL</sub>                                               | This study                             |
| MD5449 | SV5015 pGEN222( $\Delta$ PompC- <i>ova</i> ) (promoter-less vector)                                                 | This study                             |
| MD5451 | SV5015 <i>rpoS::Cm<sup>R</sup></i> PBP2 <sub>SAL</sub> -3xFLAG PBP3 <sub>SAL</sub> -3xFLAG                          | This study                             |
| MD5077 | SV5015 <i>rpoE::Km<sup>R</sup></i> PBP2 <sub>SAL</sub> -3xFLAG PBP3 <sub>SAL</sub> -3xFLAG                          | This study                             |
| MD3238 | SV5015 <i>dacC</i> -3xFLAG:: <i>Km<sup>R</sup></i>                                                                  | This study                             |
| MD3843 | SV5015 <i>ompR1009::Tn10 dacC</i> -3xFLAG:: <i>Km<sup>R</sup></i>                                                   | This study                             |
| MD1168 | SV5015 <i>ssrB::3xFLAG::Km<sup>R</sup></i>                                                                          | (Núñez-Hernández <i>et al.</i> , 2013) |
| MD1158 | SV5015 <i>sseJ::3xFLAG::Km<sup>R</sup></i>                                                                          | (Núñez-Hernández <i>et al.</i> , 2013) |

---

#### *E. coli*

---

|                             |                                                                                                 |                |
|-----------------------------|-------------------------------------------------------------------------------------------------|----------------|
| MG1655                      | K-12, wild type                                                                                 |                |
| MD4445                      | MG1655 pAC                                                                                      | This study     |
| MD4448                      | MG1655 pAC-PBP3 <sub>SAL</sub>                                                                  | This study     |
| MD5442                      | MG1655 pGEN222( $\Delta$ PompC- <i>ova</i> )::P-PBP2 <sub>SAL</sub> - <i>gfp</i> <sup>TCD</sup> | This study     |
| MD5443                      | MG1655 pGEN222( $\Delta$ PompC- <i>ova</i> )::P-PBP3 <sub>SAL</sub> - <i>gfp</i> <sup>TCD</sup> | This study     |
| MD5450                      | MG1655 pGEN222( $\Delta$ PompC- <i>ova</i> ) (promoter-less vector)                             | This study     |
| E2348/69                    | EPEC, wild type (O127:H6)                                                                       | L.A. Fernández |
| EDL933- $\Delta$ <i>stx</i> | EHEC, $\Delta$ <i>stx1</i> $\Delta$ <i>stx2</i> (O157:H7)                                       | L.A. Fernández |
| 536                         | UPEC, wild type (O6:K15:H31)                                                                    | L.A. Fernández |
| C609                        | EIEC, wild type, ST-99 (O96:H19)                                                                | A. San Millán  |
| C610                        | EIEC, wild type, ST-99 (O96:H19)                                                                | A. San Millán  |

---

#### *Citrobacter rodentium*

---

|        |                                                          |                |
|--------|----------------------------------------------------------|----------------|
| ICC169 | spontaneous NaI <sup>R</sup> of wild type isolate ICC168 | L.A. Fernández |
|--------|----------------------------------------------------------|----------------|

---

#### Plasmids

---

|                |                       |                                    |
|----------------|-----------------------|------------------------------------|
| pAC-Plac       | <i>Cm<sup>R</sup></i> | (Castanheira <i>et al.</i> , 2017) |
| pAC-6xHIS-Plac | <i>Cm<sup>R</sup></i> | (Castanheira <i>et al.</i> , 2017) |

|              |                                                                                    |                                    |
|--------------|------------------------------------------------------------------------------------|------------------------------------|
| pCP20        | FLP+, Amp <sup>R</sup> , Cm <sup>R</sup>                                           | (Cherepanov and Wackernagel, 1995) |
| pSUB11       | 3xFLAG sequence, Km <sup>R</sup>                                                   | (Uzzau <i>et al.</i> , 2001)       |
| pKD46        | γ, β, <i>exo.</i> Amp <sup>R</sup>                                                 | (Datsenko and Wanner, 2000)        |
| pGEN222      | Amp <sup>R</sup> ; p15A-ori, <i>hok/sok</i> stability system, <i>PompC::gfp-UV</i> | (Galen <i>et al.</i> , 1999)       |
| pGEN222-ova- | pGEN222- <i>PompC-ova-gfp</i> <sup>TCD</sup>                                       | L.A. Fernández                     |

---

## References - Table S1

- Castanheira, S., Cestero, J.J., Rico-Pérez, G., García, P., Cava, F., Ayala, J.A., *et al.* (2017) A Specialized Peptidoglycan Synthase Promotes *Salmonella* Cell Division inside Host Cells. *mBio* **8**: e01685-17.
- Castanheira, S., Lopez-Escarpa, D., Pucciarelli, M.G., Cestero, J.J., Baquero, F., and Garcia-Del Portillo, F. (2020) An alternative penicillin-binding protein involved in *Salmonella* relapses following ceftriaxone therapy. *EBioMedicine* **55**: 102771.
- Cherepanov, P.P., and Wackernagel, W. (1995) Gene disruption in *Escherichia coli*: TcR and KmR cassettes with the option of Flp-catalyzed excision of the antibiotic-resistance determinant. *Gene* **158**: 9–14.
- Datsenko, K.A., and Wanner, B.L. (2000) One-step inactivation of chromosomal genes in *Escherichia coli* K-12 using PCR products. *Proc Natl Acad Sci U S A* **97**: 6640–6645.
- Galen, J.E., Nair, J., Wang, J.Y., Wasserman, S.S., Tanner, M.K., Sztein, M.B., and Levine, M.M. (1999) Optimization of plasmid maintenance in the attenuated live vector vaccine strain *Salmonella typhi* CVD 908-htrA. *Infect Immun* **67**: 6424–6433.
- Núñez-Hernández, C., Tierrez, A., Ortega, A.D., Pucciarelli, M.G., Godoy, M., Eisman, B., *et al.* (2013) Genome expression analysis of nonproliferating intracellular *Salmonella enterica* serovar Typhimurium unravels an acid pH-dependent PhoP-PhoQ response essential for dormancy. *Infect Immun* **81**: 154–165.
- Uzzau, S., Figueroa-Bossi, N., Rubino, S., and Bossi, L. (2001) Epitope tagging of chromosomal genes in *Salmonella*. *Proc Natl Acad Sci U S A* **98**: 15264–15269.
- Vivero, A., Baños, R.C., Mariscotti, J.F., Oliveros, J.C., García-del Portillo, F., Juárez, A., and Madrid, C. (2008) Modulation of horizontally acquired genes by the Hha-YdgT proteins in *Salmonella enterica* serovar Typhimurium. *J Bacteriol* **190**: 1152–1156.

**Table S2.** Oligonucleotides used in the study as primers

| Primer name            | Sequence (5'-3') (*)                                         |
|------------------------|--------------------------------------------------------------|
| FLAG MrcA Fw           | ACCATTATTGATAATGGTCAAACACACGAACTGTTCCGACTACAAAGACCATGACGG    |
| FLAG MrcA Rv           | GCTAAACACAATAAAAAAGGCGCCGGAGCGCCTTTTTTGACATATGAATATCCTCCTTA  |
| FLAG MrcB Fw           | GTTGCCGGCTGGATTAAGGAGATGTTCCGGCGGCAATGACTACAAAGACCATGACGG    |
| FLAG MrcB Rv           | GACCGGGTAAGCACAGCGCCACCCGGCACTATTACCGTGACATATGAATATCCTCCTTA  |
| FLAG PBP 2* Fw         | TGATCCACAGGCTGATAACCACACAGCCGGATCAGGCGCCAGACTACAAAGACCATGAC  |
| FLAG PBP 2* Rv         | TCCGGCCGTATCCTTGTCTGATGGCGCTTTGCTTATTTGACATATGAATATCCTCCTTAG |
| FLAG PBP 3* Fw         | TCTGGTGATGCATGGCAGCCACGTTGCGGTTCCGGGTTCCGGACTACAAAGACCATGAC  |
| FLAG PBP 3* Rv         | GGGCGCAAGTGTAAACGCGAATTGCGCCCCGGGAAAATCCTCATATGAATATCCTCCTTA |
| pPBP2sal_EcoRI_NotI_Fw | GC <b>GAATTC</b> GGCGCAACTGACGGCGAAG                         |
| pPBP2sal_EcoRI_NotI_Rv | ATAAGAAT <b>GCGGCCGC</b> GAACAATCCGCCGCCTAATG                |
| pPBP3sal_EcoRI_NotI_Fw | GC <b>GAATTC</b> CCAGAAAGGTCCGGCTG                           |
| pPBP3sal_EcoRI_NotI_Rv | ATAAGAAT <b>GCGGCCGC</b> AGCCGAATCATTTTTTCAGG                |
| pPBP2sal_mut_Fw        | GCCACAGCGGTATATCGCTCGGACATCACAAGGAATGAC                      |
| pPBP2sal_mut_Rv        | GTCATTCCTTGTGATGTCGGAGCGATATACCGCTGTGGC                      |
| pPBP3sal_mut_Fw        | GCTCTCGTTAGCGATTGCTCGGACAGGCGCGATGTTATTAG                    |
| pPBP3sal_mut_Rv        | CTAATAACATCGCGCCTGTCCGAGCAATCGCTAACGAGAGC                    |
| pGEN222_Fw             | GTCTCTGTTATTCAGGCAATTC                                       |
| FLAG PBP6 Fw           | GCTGATGAACTCCATCAGTGGTTTGGCAGTTGGTTCTCGACTACAAAGACCATGACG    |
| FLAG PBP6 Rv           | CCGTAGCCGGATGCGACGCGCACCCGGCTACGGAGTTATTCATATGAATATCCTCCTTA  |

(\*) Bold red: restriction enzyme sites; underlined: sequences of the mutated OmpR box variants; blue colour, sequence of pSUB11 vector.
